# Supplementary material
Source: Springer Nature journal article supplement (https://www.springermedizin.de/resource/supplementary/12889_2013_5845_MOESM1_ESM.pdf/9496204)
Supplement: MOESM1 [file 9496204]

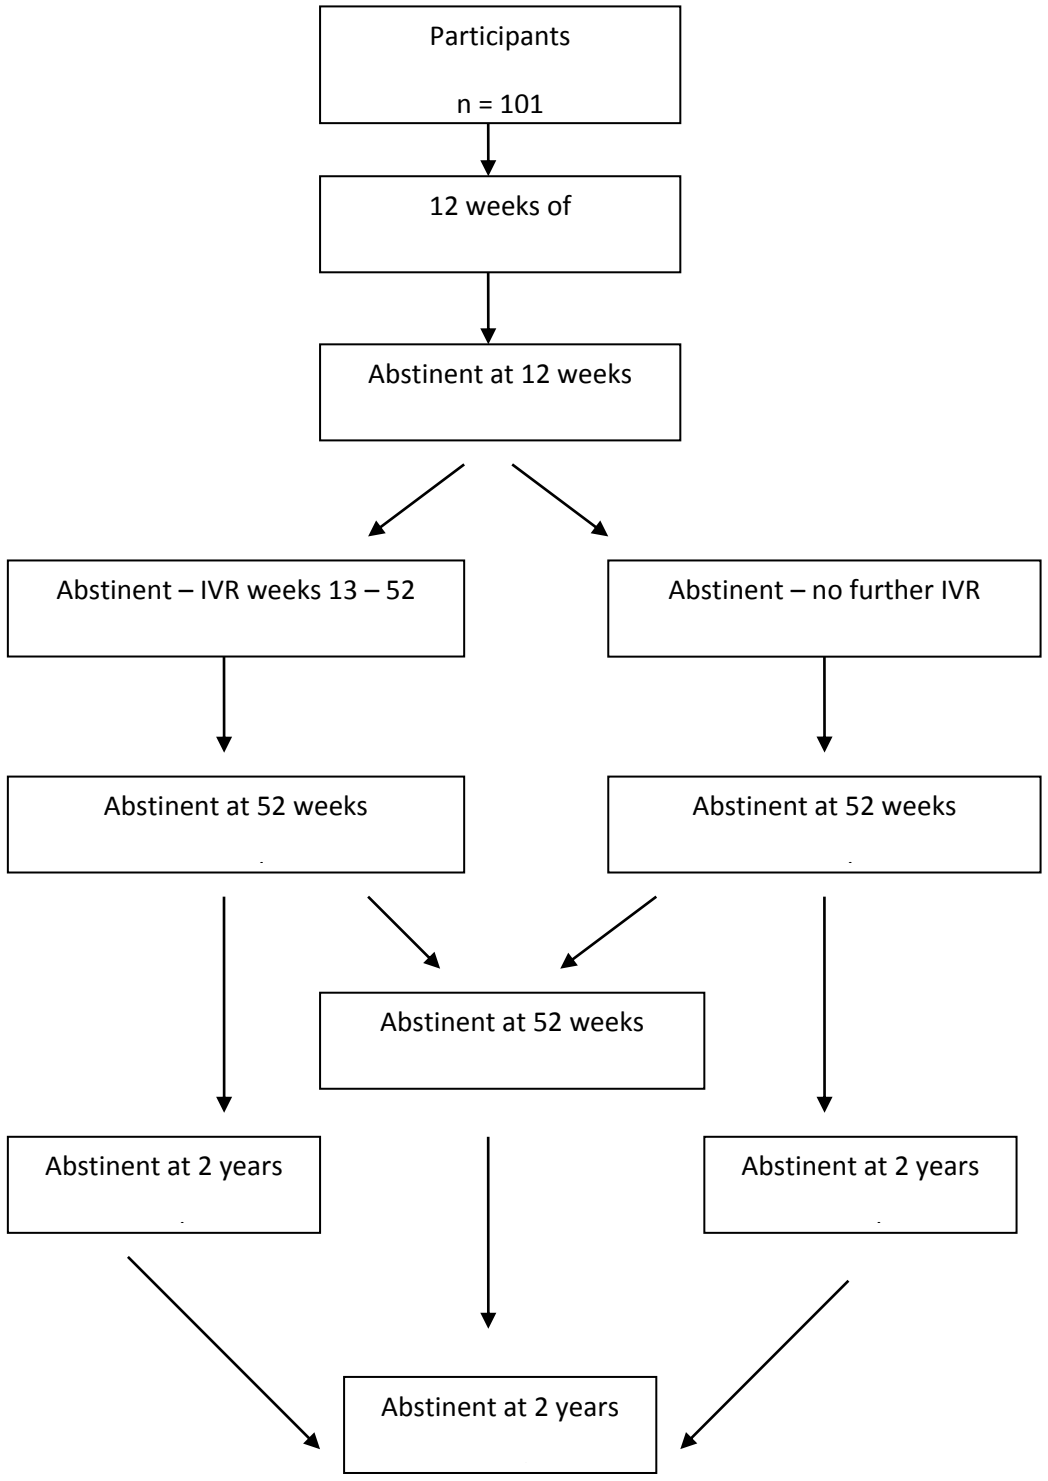

Participants

n = 101

12 weeks of

Abstinent at 12 weeks

Abstinent – IVR weeks 13 – 52

Abstinent – no further IVR

Abstinent at 52 weeks

Abstinent at 52 weeks

Abstinent at 52 weeks

Abstinent at 2 years

Abstinent at 2 years

Abstinent at 2 years
